# Supplementary material for: A Rapid Monitoring and Evaluation Method of Schistosomiasis Based on Spatial Information Technology
Source: Int J Environ Res Public Health. 2015 Dec 12;12(12):15843–59. doi: 10.3390/ijerph121215025 (PMC4690961; doi:10.3390/ijerph121215025)
Supplement: Supplementary File 1 [file ijerph-12-15025-s001.xlsx]

## Sheet: Sheet1
Year	Chinese standard code of County/City	Name of county/city	Name of town	Name of village	Longitude	Latitude	Epidemic village number in current year	The cumulative history of new area of snail (hm2)	The cumulative number of snail village	The number of snail village in current year	Area of snail (hm2)
											Actual area of snail(Current year plus last year)	Including		Snail distribution in different type\environment
												The total area of investigation	The total area of snail	Including
														Lake type & islet subtype																Lake type & bottomland subtype																Distribution of snail environment type
														Actual area of snail(This year plus legacy number)	The total area of investigation	The total area of snail	Including					The total average snail density of village								Actual area of snail(Current year plus last year)	The total area of investigation	The total area of snail	Including					The total average snail density of village								River bottomland	Ditch	Swag	Wasteland
																	New area	Recurrence area	Susceptible area	Area of positive snails	Number of positive snails	Basket number of investigation	Basket number of snails	Basket number of live snails	Basket number of positive snails	Total number of capture of snails	The number of dissection snails	The number of live snails	The number of positive snails				New area	Recurrence area	Susceptible area	Area of positive snails	Number of positive snails	Basket number of investigation	Basket number of snails	Basket number of live snails	Basket number of positive snails	Total number of capture of snails	The number of dissection snails	The number of live snails	The number of positive snails
2012	430611	Junshan District	Lvliuzhou	Yuehua	113.025	29.3934	1	901.07	2	1	2	24.0001	2	2	24.0001	2	0	0	0	0	0	320	300	33	0	89	89	89	0	0	0	0	0	0	0	0	0	0	0	0	0	0	0	0	0	0	2	0	0
2012	430611	Junshan District	Lvliuzhou	Shuangyuan	113.034	29.3967	1	2.73	1	1	0.13	20.6668	0.13	0.13	20.6668	0.13						280	1	1	0	1	1	1	0																	0.13
2012	430611	Junshan District	Lvliuzhou	Tongxin	113.043	29.4008	1	126.66	1	1	10	10	0.13	10	0.13	10						100	1	1	0	1	1	1	0
2012	430611	Junshan District	Lvliuzhou	Shangfanju	113.052	29.4442	1	25.33	1	1	2.67	13.3334	2.67																	2.67	13.3334	2.67						150	1	1	0	1	1	1	0	2.67
2012	430611	Junshan District	Lvliuzhou	Erzhouzi	113.052	29.4541	1	619.49	1	1	2.53	70	2.53		3.33							280	1	1	0	1	1	1	0	2.13334	66.6	2.13334						200	3	3	0	3	3	3	0	2.13	0.4
2012	430611	Junshan District	Lvliuzhou	Wawan	113.033	29.5	1	105.03	1	1	1.54	66.67	1.54																	1.54	66.67	1.54						200	2	2	0	3	3	3	0	1.54
2012	430611	Junshan District	Lvliuzhou	Sanjiadian	113.025	29.5008	1	561.94	1	1	0.2	20	0.2	0.07		0.07														0.2	20	0.2						100	1	1	0	1	1	1	0	0.2
2012	430621	Yueyang County	Lujiao	Lujiao	112.969	29.4631	1	297.08	1	1	0.07	0.67	0.07	0.07	0.67	0.07						280	2	2	0	5	5	5	0																		0.07
2012	430621	Yueyang County	Lujiao	Binhu	113.023	29.195	1	1083.84	1	1	0.07	1.33	0.07		1.33							140	3	3	0	8	8	8	0																		0.07
2012	430621	Yueyang County	Lujiao	Lixin	113.039	29.195	1	333.33	1	1	144.93	173.33	144.93																	144.93	173.33	144.93			13.33	1.17	1	3800	60	60	1	162	162	162	1	144.93
2012	430621	Yueyang County	Matang	Wanlong	113.066	29.1852	1	266.67	1	1	58.47	80	58.47																	58.47	80	58.47			10	0.34	1	1700	52	52	2	188	188	188	2	58.47
2012	430621	Yueyang County	Matang	Beihu	113.086	29.2179	1	397.34	1	1	99.73	133.33	99.73																	99.73	133.33	99.73			6.67	0.34	1	3000	27	27	2	138	138	138	2	99.73
2012	430623	Huarong County	Beizhouzi	Nongle	113.071	29.2524	1	128.72	1	1	22.93	40	22.93																	22.93	40	22.93						800	3	3	0	3	3	3	0	22.93
2012	430623	Huarong County	Beizhouzi	Wumenzha	112.942	29.345	1	73.33	1	1	43.47	60	43.47																	43.47	60	43.47						1500	3	3	0	3	3	3	0	43.47
2012	430623	Huarong County	Shuangfeng	Xizhou	112.902	29.2958	1	56.4	1	1	0.34	6.67	0.34	0.34	6.67	0.34						200	1	1	0	1	1	1	0	0	0	0						200	0	0	0	0	0	0	0		0.34
2012	430623	Huarong County	Shuangfeng	Hexing	112.759	29.2343	1	48.27	1																					0	0	0
2012	430681	Miluo County	Yingtian	Hehua	112.971	29.1032	1	127.4	1	1	23.47	36.67	23.47																	23.47	36.67	23.47						900	3	3	0	3	3	3	0	23.47
2012	430681	Miluo County	Yingtian	Yinan	113.013	29.1392	1	57.4	1																					0	0	0
2012	430624	Xiangyin County	Bainihu	Jiakou	112.965	28.9761	1	6.67	1																					0	0	0
2012	430624	Xiangyin County	Bainihu	Gangkou	112.98	28.9441	1	47.67	1	1	18.27	20	18.27																	18.27	20	18.27						600	3	3	0	3	3	3	0	18.27
2012	430624	Xiangyin County	Wenxing	Xiangyang	112.891	28.8802	1	51.2	1																					0	0	0
2012	430624	Xiangyin County	Wenxing	Qinghu	112.874	28.908																								0	0	0
[truncated: 34 more columns]
